# Supplementary material for: Redox dysregulation, inflammation and mental health in adults with high risk of childhood maltreatment
Source: Research Square preprint supplement (doi:10.21203/rs.3.rs-6801083/v1), 2025-07-01
Supplement: Supplementary file 1 [file a6315ca45176ffc4c87b4c5e.docx]

**Supplements for *Redox dysregulation, inflammation and mental health in adults with high risk of childhood maltreatment***

Clara von Wendorff 1,7 #, Maria Meier 2, 3, #, Daniella Dwir 4, Paul Klauser 4, Gizem Demirkiran 4, Patricia Schneider 4, Mickaël Das Neves 4, David Bürgin 2, 5, Cyril Boonmann 2, 6, Jörg Fegert 1,7, Marc Schmid 2,Vera Clemens 1,7

1 Department for Child and Adolescent Psychiatry/Psychotherapy, University of Ulm, Ulm, Germany

2 Child and Adolescent Psychiatric Research Department, University Psychiatric Clinics Basel (UPK), University of Basel, Switzerland

3 Department of Psychology, University of Konstanz, Konstanz, Germany

4 Center for Psychiatric Neuroscience, Department of Psychiatry, Centre Hospitalier Universitaire Vaudois and University of Lausanne (CHUV-UNIL), Prilly-Lausanne, Switzerland

5 Jacobs Center for Productive Youth Development, University of Zurich, Zurich, Switzerland

6 Department of Child and Adolescent Psychiatry, Leiden University Medical Center (LUMC) Curium, The Netherlands
7 German Center for Mental Health (DZPG), partner site Ulm
# shared first authorship

**ORCIDs:**

Clara von Wendorff: 0009-0001-4122-4356

Maria Meier: 0000-0002-1655-5479

Daniella Dwir: [0000-0003-4931-9007](https://orcid.org/0000-0003-4931-9007)

Paul Klauser: ​​0000-0003-0284-4947

David Bürgin: [0000-0002-0856-1342](https://orcid.org/0000-0002-0856-1342)

Cyril Boonman: 0000-0002-2862-884X

Marc Schmid: 0000-0002-6634-4442

Vera Clemens: 0000-0001-5485-4691

**Corresponding author:** Clara von Wendorff ([clara.vonwendorff@uniklinik-ulm.de](mailto:clara.vonwendorff@uniklinik-ulm.de)), Maria Meier ([maria.meier@unibas.ch](mailto:maria.meier@unibas.ch))

**Figure S1:** Flow Chart of Study Participants through the study baseline (MAZ. study), follow-up study (JAEL & JAELred study) with final sample sizes included in the current data analysis.

**
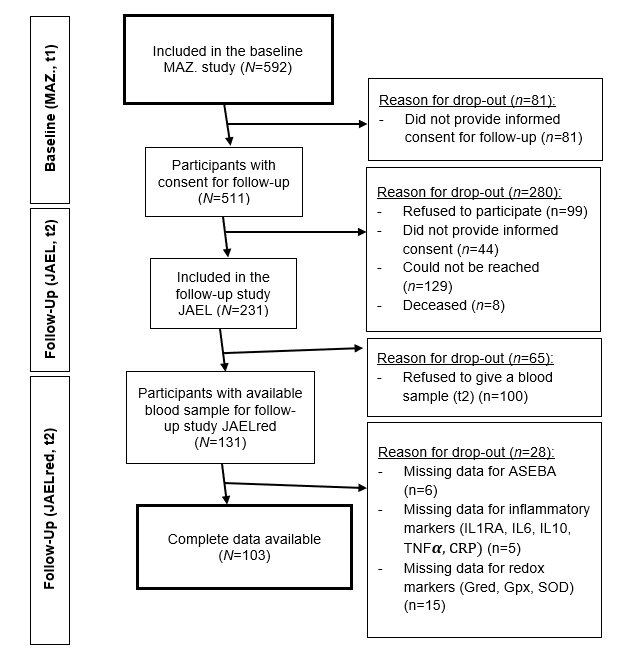
**

**Table S1:** Pearson’s correlations between mental health, CM, OS markers, and inflammatory markers

| **Biomarkers** | **Childhood maltreatment (CTQ)** | **Mental Health Problems (ASEBA)** |
| --- | --- | --- |
| **SOD** | .07 | .11 |
| **GPx/GRed(log)** | .19* | .05 |
| **GRed(log)** | -.13 | .01 |
| **GPx** | .11 | .06 |
| **CRP(log)** | .04 | -.03 |
| **TNF**𝞪 | .06 | .17 |
| **IL1RA(log)** | .03 | .13 |
| **IL6(log)** | -.05 | .07 |
| **IL10(log)** | .03 | .08 |

*Note.* no Bonferroni correction was used because of the exploratory aspect. ** *p* < .01; * *p* < .05; Between *n* = 97 and *n* = 130

**Table S2:** Pearson’s correlation coefficients between the biomarkers, CTQ, ASEBA and potential covariates.

|  | **age** | **sex** | **smoking** | **fasting** | **BMI** | **time difference** |
| --- | --- | --- | --- | --- | --- | --- |
| **SOD** | -.08 | -.04 | .09 | .07 | .11 | .04 |
| **GPx** | -.20* | .21* | -.08 | .17 | -.09 | -.03 |
| **GRed(log)** | .04 | -.04 | -.30** | .05 | .12 | -.09 |
| **GPx/GRed (log)** | -.15 | .15 | .22* | .03 | -.14 | .07 |
| **CRP(log)** | .23** | -.09 | .17 | -.05 | .37*** | -.01 |
| **TNF𝞪** | -.04 | -.11 | -.01 | .01 | -.01 | .16 |
| **IL6(log)** | .27** | -.11 | .17 | -.10 | .26** | -.06 |
| **IL10(log)** | -.04 | .01 | .09 | .03 | .03 | .06 |
| **IL1RA(log)** | .05 | .05 | .17 | .10 | .41*** | .22* |
| **ASEBA total** | -.17 | .25** | .21* | .19* | .06 | .17 |
| **CTQ total** | -.10 | .36*** | .12 | -.11 | .01 | .22* |

*Note.* *** *p* < .001; ** *p* <.01; * *p* < .05. Between *n* = 86 and *n* = 131.

**Table S3:** Results of the regression model in which we predicted mental health problems (ASEBA total score) by CM (CTQ total score).

| **Predictor** | ***ß*** | ***p*** |
| --- | --- | --- |
| Intercept | -0.70 | <.001*** |
| CTQ total score | 0.39 | <.001*** |
| sex | 0.15 | .47 |
| smoking  (1 = yes; 0 = no) | 0.55 | .09 |

*Note.* *** *p* < .001; *n* = 96

**Table S4:** Results of the regression model in which we predicted GPx/GRed (log) by CM (CTQ total score).

| **Predictor** | **ß** | ***p*** |
| --- | --- | --- |
| Intercept | -0.65 | .07 |
| CTQ total | 0.20 | .03* |
| smoking  (1 = yes; 0 = no) | 0.67 | .07 |

*Note.* * *p* < .05; *n* = 87.

**Table S5:** Results of the regression model in which we predicted SOD by CM (CTQ total score).

| **Predictor** | **ß** | ***p*** |
| --- | --- | --- |
| Intercept | 0 | .99 |
| CTQ total | 0.07 | .43 |

*Note.* *n* = 114

**Table S6:** Results of the regression model in which we predicted GPx/GRed (log) by emotional abuse (CTQ subscale).

| **Predictor** | **ß** | ***p*** |
| --- | --- | --- |
| Intercept | -0.68 | .05 |
| CTQ emotional abuse | 0.24 | .01* |
| smoking  (1 = yes; 0 = no) | 0.70 | .05 |

*Note.* * *p* < .05; *n* = 87

**Table S7:** Results of the regression model in which we predicted IL1RA(log) by CM (CTQ total score).

| **Predictor** | **ß** | ***p*** |
| --- | --- | --- |
| Intercept | -0.05 | .59 |
| CTQ total | 0.02 | .74 |
| BMI | 0.40 | <.001*** |
| time difference | 0.03 | .73 |

*Note.* *** *p* < .001; *n* = 96

**Table S8:** Results of the regression model in which we predicted IL-6(log) by CM (CTQ total score)

| **Predictor** | **ß** | ***p*** |
| --- | --- | --- |
| Intercept | -0.12 | .17 |
| CTQ total | -0.01 | .92 |
| age | 0.17 | .06 |
| BMI | 0.21 | .02* |

*Note.* * *p* < .05; *n* = 96

**Table S9:** Results of the regression model in which we predicted IL-10(log) by CM (CTQ total score)

| **Predictor** | **ß** | ***p*** |
| --- | --- | --- |
| Intercept | -0.01 | .94 |
| CTQ total | 0.03 | .77 |

*Note.* *n* = 124

**Table S10:** Results of the regression model in which we predicted CRP(log) by CM (CTQ total score).

| **Predictor** | **ß** | ***p*** |
| --- | --- | --- |
| Intercept | -0.03 | .76 |
| CTQ total | 0.07 | .40 |
| age | 0.15 | .10 |
| BMI | 0.35 | <.001*** |

*Note.* *** *p* < .001; *n* = 99

**Table S11:** Results of the regression model in which we predicted TNF𝞪 by CM (CTQ total score).

| **Predictor** | **ß** | ***p*** |
| --- | --- | --- |
| Intercept | 0.01 | .95 |
| CTQ total | 0.06 | .49 |

*Note.* *n* = 124

**Table S12:** Results of the regression model in which we predicted mental health problems (ASEBA total score) by TNF𝞪.

| **Predictor** | **ß** | ***p*** |
| --- | --- | --- |
| Intercept | -1.31 | <.002** |
| TNF𝞪 | 0.21 | .03* |
| sex | 0.56 | .01** |
| smoking  (0 = no; 1 = yes) | 0.65 | .06 |

*Note.* * *p* < .05; ** *p* <.01; *n* = 94

**Table S13:** Results of the regression model in which we predicted mental health problems (ASEBA total score) by SOD.

| **Predictor** | **ß** | ***p*** |
| --- | --- | --- |
| Intercept | -1.42 | <.002** |
| SOD | 0.07 | .55 |
| sex | 0.59 | .01** |
| smoking  (0 = no; 1 = yes) | 0.76 | .05* |

*Note.* * *p* < .05; ** *p* <.01; *n* = 87

**TableS14:** Results of the regression model in which we predicted mental health problems (ASEBA total score) by GPx/GRed (log).

| **Predictor** | **ß** | ***p*** |
| --- | --- | --- |
| Intercept | -1.49 | <.002** |
| GPx/GRed(log) | -0.60 | .60 |
| sex | 0.60 | .01** |
| smoking (0 = no; 1 = yes) | 0.83 | .04* |

*Note.* * *p* < .05; ** *p* <.01; *n* = 87

**Table S15:** Results of the regression model in which we predicted mental health problems (ASEBA total score) by IL1RA(log).

| **Predictor** | **ß** | ***p*** |
| --- | --- | --- |
| Intercept | -2.95 | .01** |
| IL1RA(log) | 0.32 | .08 |
| sex | 0.55 | .01** |
| smoking  (0 = no; 1 = yes) | 0.54 | .13 |

*Note.* ** *p* <.01; *n* = 94

**Table S16:** Results of the regression model in which we predicted mental health problems (ASEBA total score) by IL-6(log).

| **Predictor** | **ß** | ***p*** |
| --- | --- | --- |
| Intercept | 1.28 | .002** |
| IL6(log) | 0.09 | .41 |
| sex | 0.57 | .01** |
| smoking  (0 = no; 1 = yes) | 0.60 | .11 |

*Note.* ** *p* <.01; *n* = 94

**Table S17:** Results of the regression model in which we predicted mental health problems (ASEBA total score) by IL-10(log).

| **Predictor** | **ß** | ***p*** |
| --- | --- | --- |
| Intercept | -1.26 | .003** |
| IL10(log) | 0.10 | .30 |
| sex | 0.55 | .01* |
| smoking  (0 = no; 1 = yes) | 0.61 | .09 |

*Note.* * *p* < .05; ** *p* <.01; *n* = 94

**Table S18:** Results of the regression model in which we predicted mental health problems (ASEBA total score) by CRP(log).

| **Predictor** | **ß** | ***p*** |
| --- | --- | --- |
| Intercept | -1.24 | .004** |
| CRP(log) | -0.05 | .59 |
| sex | 0.48 | .03* |
| smoking  (0 = no; 1 = yes) | 0.70 | .06 |

*Note.* * *p* < .05; ** *p* <.01; *n* = 96

**Table S19:** Pearson’s correlations between biomarkers and subtypes of CM (CTQ subscales) and mental health problems (ASEBA subscales)

| Biomarkers | Emotional abuse (CTQ) | Physical abuse (CTQ) | Physical neglect (CTQ) | Emotional neglect (CTQ) | Sexual abuse (CTQ) | Internalizing mental health problems (ASEBA) | Externalizing mental health problems (ASEBA) |
| --- | --- | --- | --- | --- | --- | --- | --- |
| SOD | .09 | .03 | -.02 | -.01 | .14 | .09 | .03 |
| GPx/GRed  (log) | .19* | .11 | .02 | .14 | .14 | .10 | -.06 |
| GRed(log) | -.17 | -.02 | 0 | -.06 | -.09 | -.03 | .10 |
| GPx | .08 | .02 | -.01 | .14 | .10 | .16 | .04 |
| CRP(log) | -.02 | .11 | .05 | .06 | -.08 | -.14 | -.07 |
| TNF𝞪 | .01 | -.01 | .04 | .11 | .07 | .13 | .11 |
| IL1RA(log) | .10 | -.02 | -.01 | 0 | .10 | .09 | .08 |
| IL6(log) | -.06 | -.02 | .05 | -.07 | -.06 | -.01 | -.01 |
| IL10(log) | .07 | -.02 | -.13 | .04 | .08 | .03 | -.03 |

Note. * p<.05. *n* = between 115 and 130.

**Table S20:** Differences in OS and inflammation status between participants with and without any psychiatric diagnosis (HITOP).

|  | Without psychiatric diagnosis | | With any psychiatric diagnosis | |  |  | |  | |  | |
| --- | --- | --- | --- | --- | --- | --- | --- | --- | --- | --- | --- |
|  | *M* | *SD* | *M* | *SD* | *df* | | *t* | | *p* | | *Cohen’s d* |
| SOD | 0.34 | 1.03 | -0.07 | 1 | 106 | | 1.49 | | .14 | | .41 |
| GPx/GRed(log) | -0.24 | 1.02 | -0.03 | 0.98 | 106 | | -0.71 | | .48 | | .20 |
| IL1-R | -0.21 | 0.97 | -.01 | 0.98 | 116 | | -0.82 | | .42 | | .20 |
| IL6 | -0.43 | 0.7 | 0.09 | 1.02 | 116 | | -2.13 | | .04* | | .53 |
| IL10 | 0.05 | 0.93 | -0.05 | 1.03 | 116 | | 0.37 | | .71 | | .09 |
| CRP | -0.12 | 1.06 | 0.04 | 0.95 | 121 | | -0.66 | | .51 | | .16 |
| TNF | -0.07 | 0.96 | -0.06 | 0.96 | 116 | | -0.05 | | .96 | | .01 |

*Note*. All biomarkers were z-standardized.
